# Supplementary material
Source: PubMed Central journal article supplement (PMC6582952)
Supplement: NIHMS1035232-supplement-1.pdf [file NIHMS1035232-supplement-1.pdf]

# *Supplementary Information*

## **Metabolomic Studies of Live Single Cancer Stem Cells**

### **Using Mass Spectrometry**

#### **AUTHORS:**

Mei Sun, Zhibo Yang\*

#### ***AUTHOR ADDRESS***

*Department of Chemistry and Biochemistry, University of Oklahoma, Norman, Oklahoma 73019, USA*

*\*Address reprint requests to Dr. Zhibo Yang, Department of Chemistry and Biochemistry, University of Oklahoma, Norman, Oklahoma 73019, USA*

*Tel: (405) 325-1772*

*Email: [Zhibo.Yang@ou.edu](mailto:Zhibo.Yang@ou.edu)*

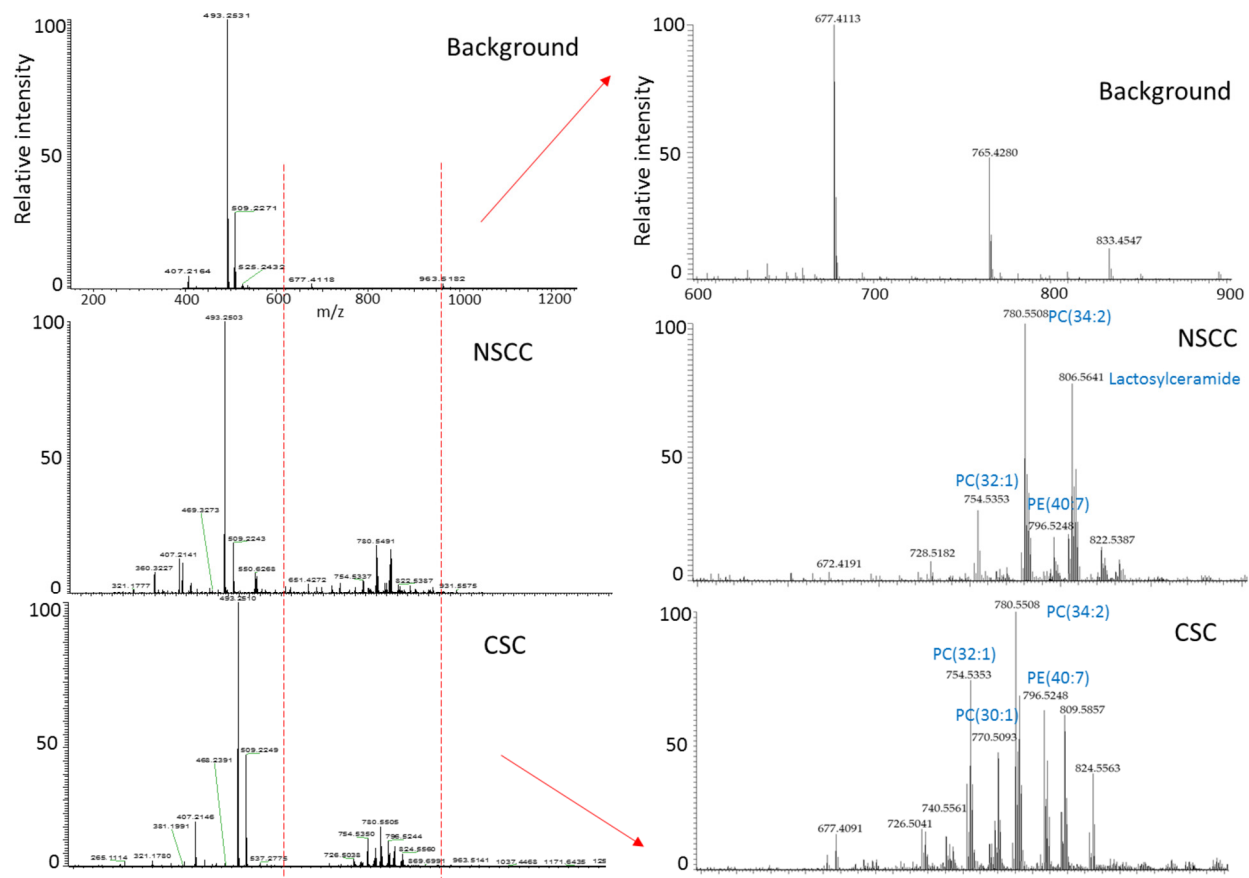

**Figure S1.** Mass spectra (positive ion mode) of (A) background, (B) a NSCC, and (C) a CSC obtained using the Single-probe SCMS technique. Figures on the right panel illustrate the zoomed-in regions of  $m/z$  600 – 900.

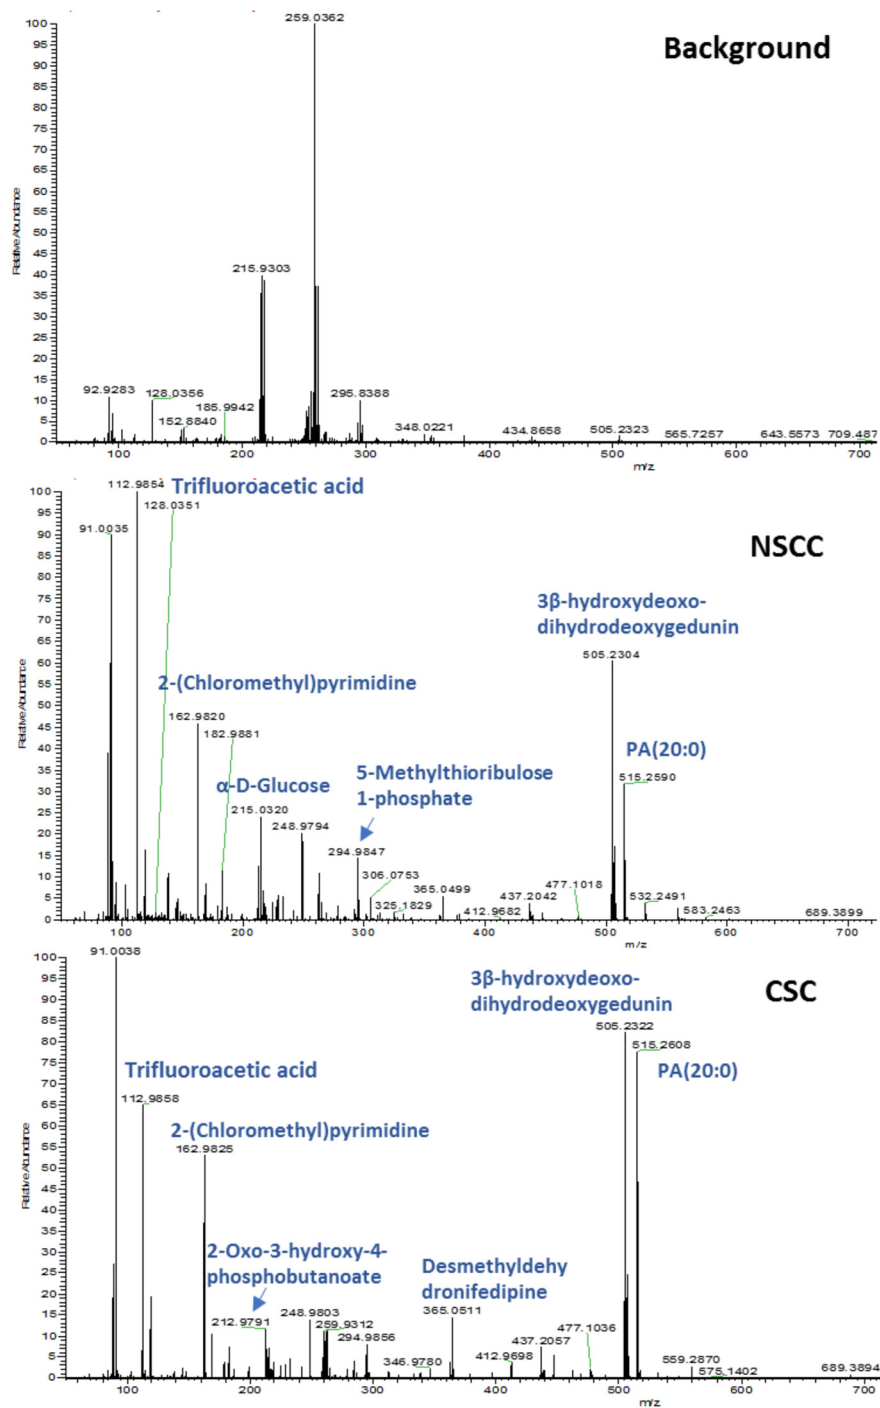

**Figure S2.** Mass spectra (negative ion mode) of (A) background, (B) a NSCC, and (C) a CSC obtained using the Single-probe SCMS technique.

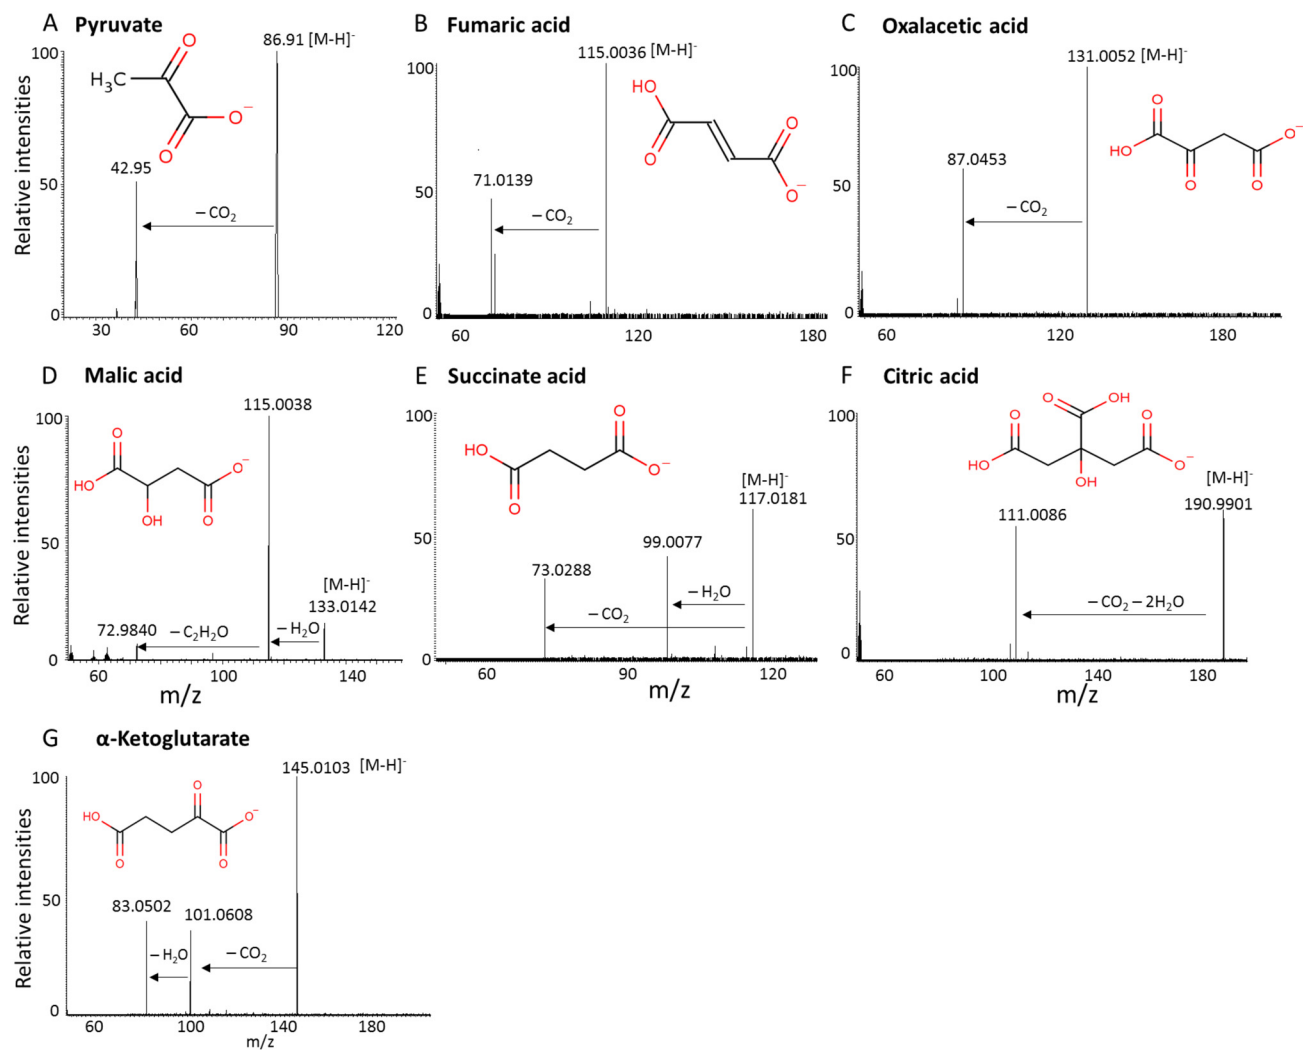

**Figure S3.** Identification of seven metabolites in the TCA cycle from MS<sup>2</sup> fragmentation (negative ion mode). (A) Pyruvate [pyruvate - H]<sup>-</sup> (m/z 86.91), (B) Fumaric acid [fumaric acid - H]<sup>-</sup> (m/z 115.0036), (C) Oxoglutaric acid [oxoglutaric acid - H]<sup>-</sup> (m/z 131.0052), (D) Malic acid [malic acid - H]<sup>-</sup> (m/z 133.0142), (E) Succinate acid [succinate acid - H]<sup>-</sup> (m/z 117.0181), (F) Citric acid [citric acid - H]<sup>-</sup> (m/z 190.9901), and (G) α-Ketoglutarate [α-ketoglutarate - H]<sup>-</sup> (m/z 145.0103). All MS<sup>2</sup> identification were confirmed through the comparison with online databases (METLIN and HMDB).

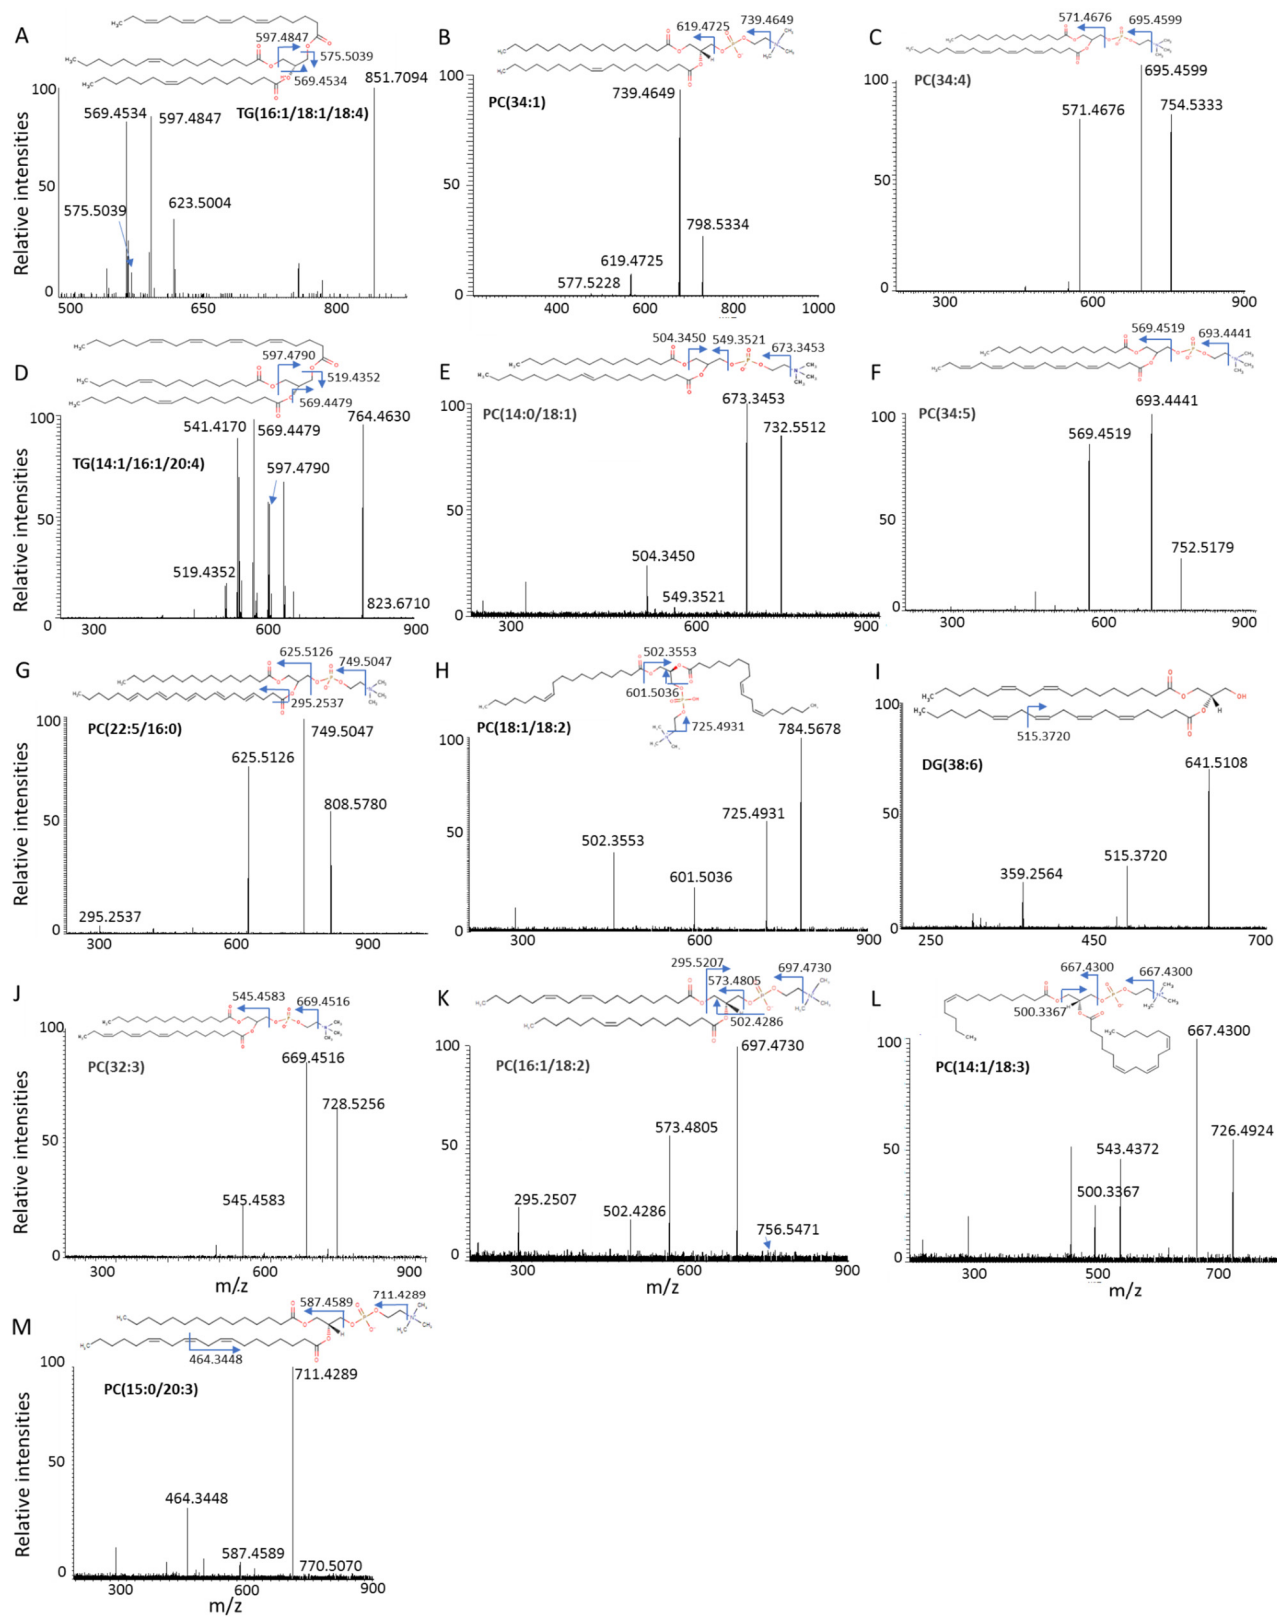

**Figure S4.** Identification of 13 unsaturated lipids from MS<sup>2</sup> fragmentation (positive ion mode). (A) TG (16:1/18:1/18:4) [TG(16:1/18:1/18:4) + H]<sup>+</sup> (m/z 851.7094), (B) PC(34:1) [PC(34:1) + K]<sup>+</sup> (m/z

798.5334), (C) PC(34:4), [PC(34:4) + H]<sup>+</sup> (m/z 754.5333), (D) TG(14:1/16:1/20:4) [TG(14:1/16:1/20:4) + H]<sup>+</sup> (m/z 823.6710), (E) PC(14:0/18:1) [PC(14:0/18:1) + H]<sup>+</sup> (m/z 732.5512), (F) PC(34:5) [PC(34:5) + H]<sup>+</sup> (m/z 752.5179), (G) PC(16:0/22:5) [PC(16:0/22:5) + H]<sup>+</sup> (m/z 808.5780), (H) PC(18:1/18:2) [PC(18:1/18:2) + H]<sup>+</sup> (m/z 784.5678), (I) DG(38:6) [DG(38:6)+H]<sup>+</sup> (m/z 641.5108), (J) PC(32:3) [PC(32:3) + H]<sup>+</sup> (m/z 728.5256) (K) PC(16:1/18:2) [PC(16:1/18:2) + H]<sup>+</sup> (m/z 756.5471), (L) PC(14:1/18:3) [PC(14:1/18:3) + H]<sup>+</sup> (m/z 726.4924), and (M) PC(15:0/20:3) [PC(15:0/20:3) + H]<sup>+</sup> (m/z 770.5070). All MS<sup>2</sup> identifications were confirmed through the comparison with online databases (METLIN and HMDB).

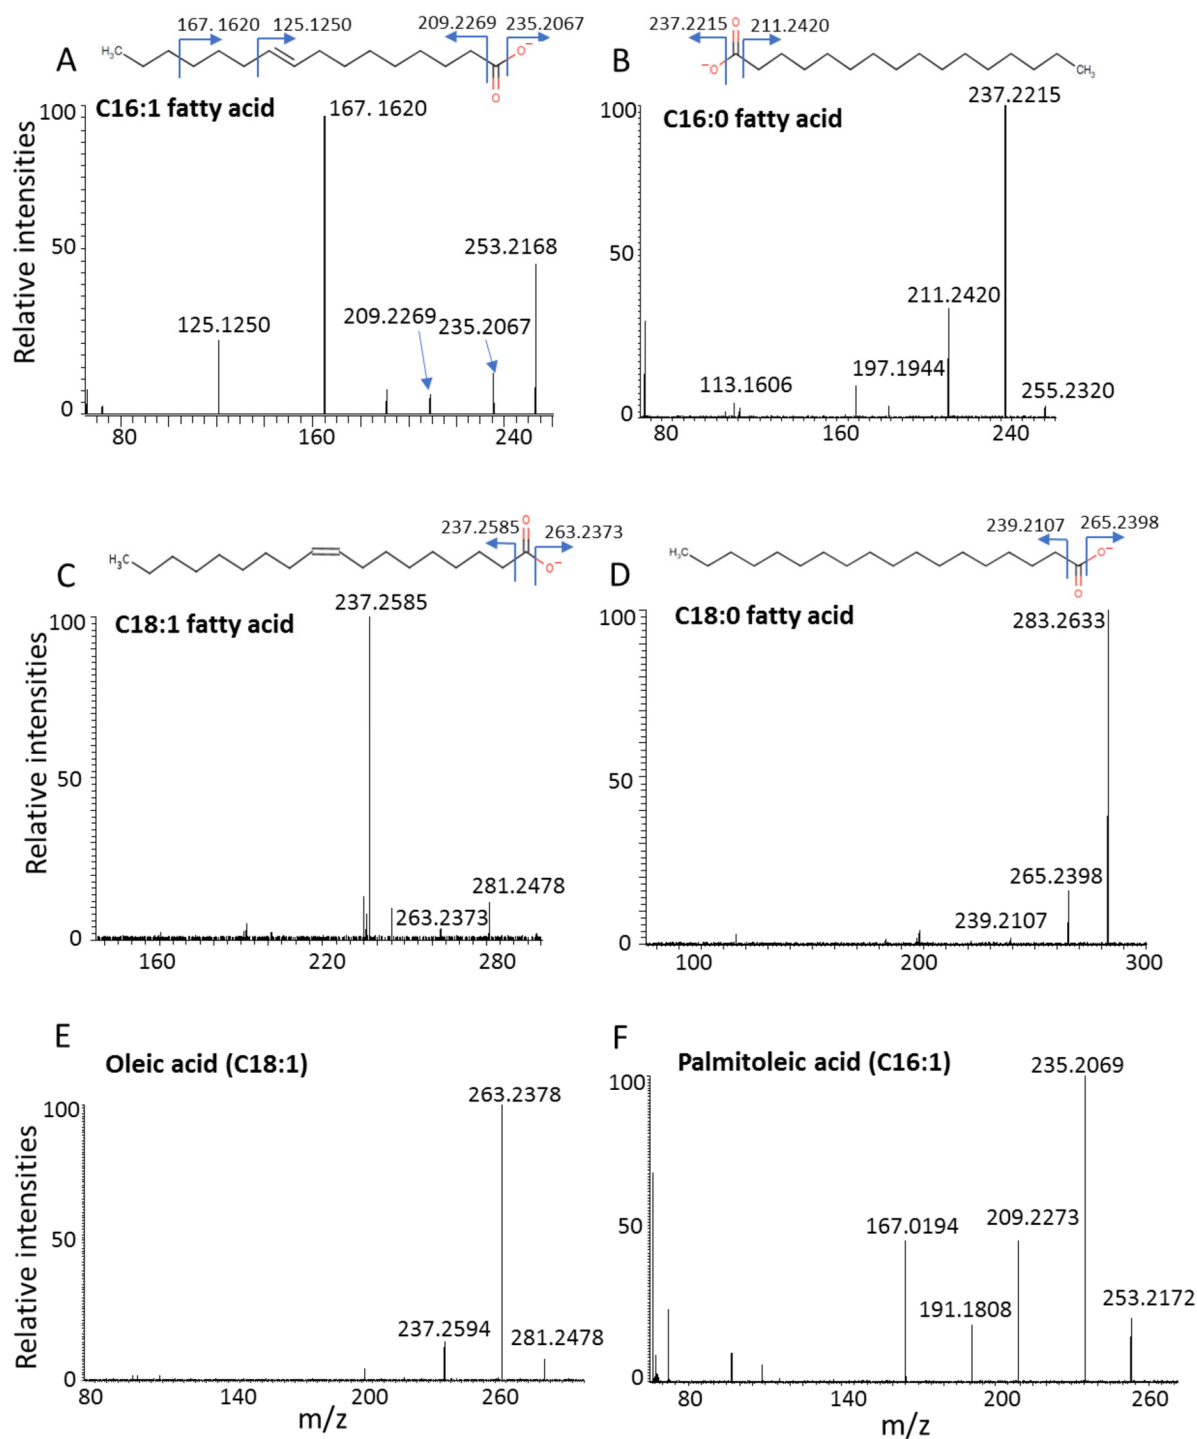

**Figure S5.** Identification of fatty acids from MS<sup>2</sup> fragmentation (negative ion mode). Single cell level identification of (A) Palmitoleic acid (C16:1) [C16:1 - H]<sup>-</sup> (m/z 253.2168), (B) Palmitic acid (C16:0) [C16:0 - H]<sup>-</sup> (m/z 255.2320), (C) Oleic acid (C18:1) [C18:1 - H]<sup>-</sup> (m/z 281.2478), (D) Stearic acid (C18:0) [C18:0 - H]<sup>-</sup> (m/z 283.2633) were. Further confirmation of (E) oleic acid [C18:1 - H]<sup>-</sup> (m/z 281.2478) and (F) palmitoleic acid ([C16:0 - H]<sup>-</sup> (m/z 253.2172) were carried out using the standard compounds. All MS<sup>2</sup> identifications were confirmed through the comparison with online databases (METLIN and HMDB) and reported studies<sup>1</sup>.

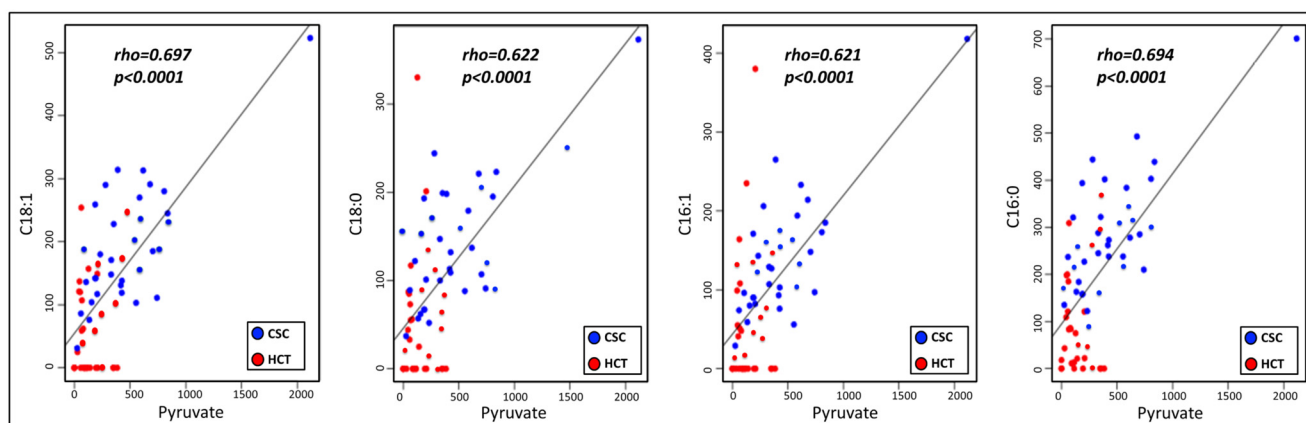

**Figure S6.** Correlation between the pyruvate and fatty acids in the CSCs and NSCCs. Pyruvate has good positive correlation with (A) C18:1, (B) C18:0, (C) C16:1, and (D) C16:0. (*rho*: correlation coefficient).

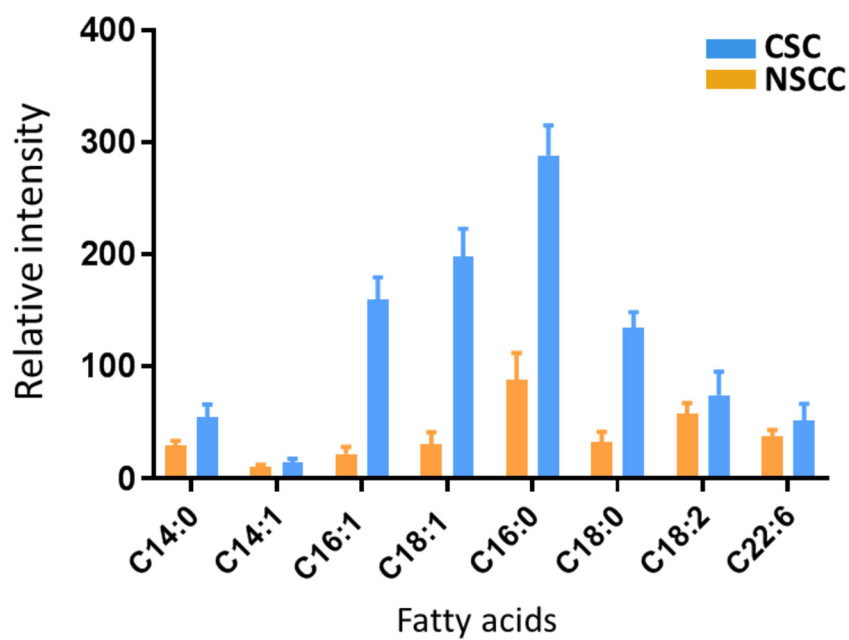

**Figure S7.** Relative abundances of fatty acids in CSCs and NSCCs.



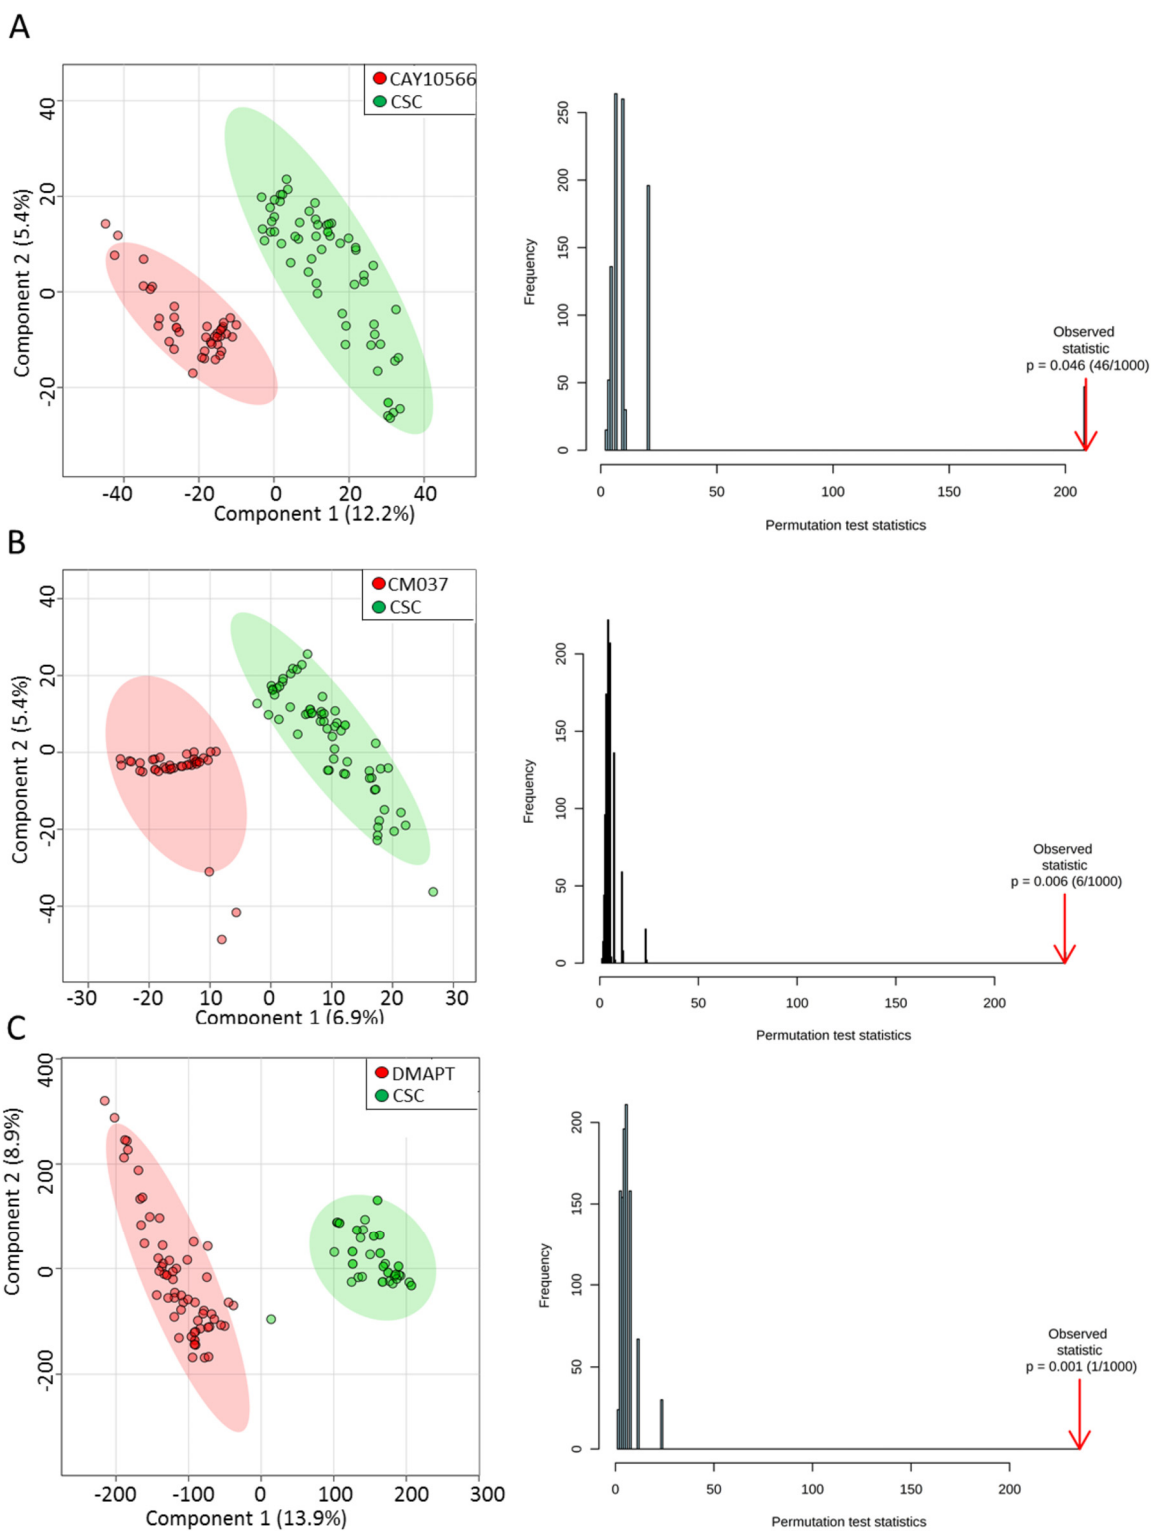

**Figure S8.** Results from Partial Least Squares Discriminant Analysis (PLS-DA) of SCMS data illustrate the overall difference of metabolites between CSCs and inhibitors with the permutation test (A) CAY10566, (B) CM037, and (C) DMAPT.

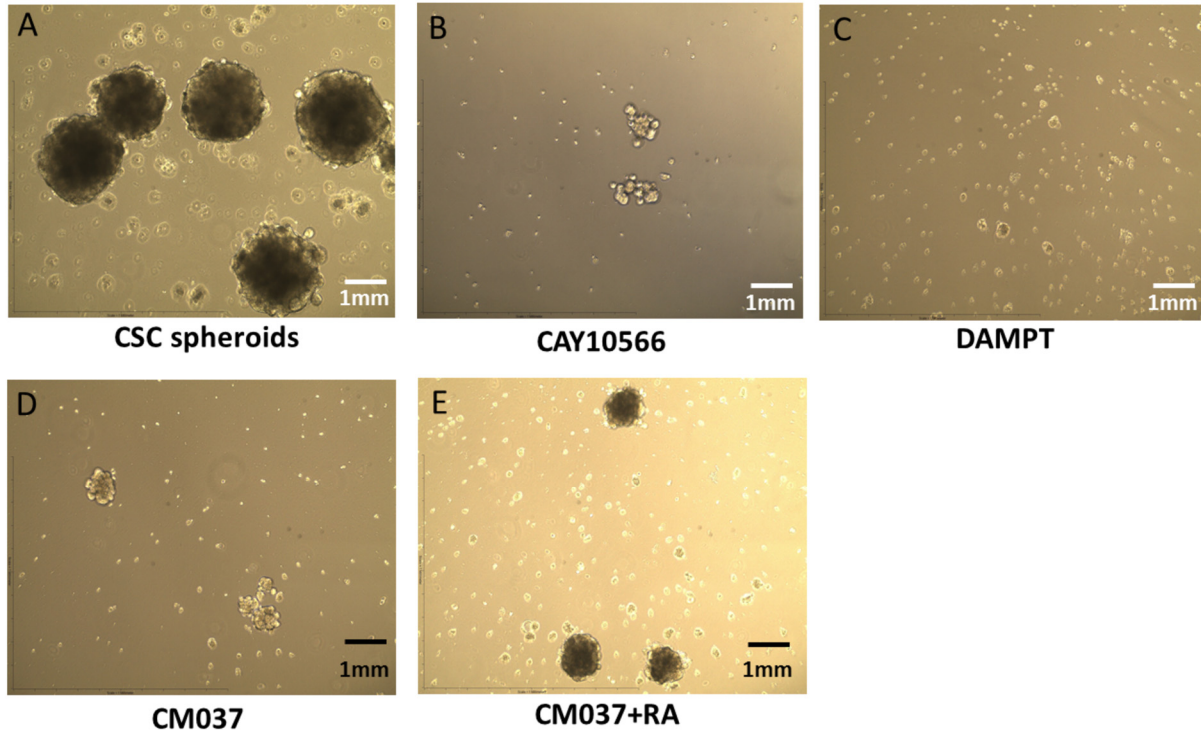

**Figure S9.** Inhibitors prevent the formation of CSC spheroids. (A) CSCs form spheroids in vitro after seven days of culture. Treatment using inhibitors of (B) SCD1 (CAY10566), (C) NF- $\kappa$ B (DMART), and (D) ALDH1A1 (CM037) suppresses the formation of spheroids. (E) Retinoic acid alleviates the inhibition of CM037 on ALDH1A1.

Reference:

(1) Zhou, Y.; Wu, Z.; Li, C.; Wang, N.; Zhang, X.; Chen, H.; Xiao, S. *Anal Methods*. **2014**, *6*, 1538-1544.
